# Supplementary material
Source: publisher site journal article supplement (https://static.cambridge.org/content/id/urn:cambridge.org:id:article:S1368980019001319/resource/name/S1368980019001319supp002.docx)
Supplement: Supplementary file 1 [file S1368980019001319supp002.docx]

Table S2. Prevalence of underweight in girls from Krakow in two subsequent cohorts by age according to two independent methods (IOTF, CDC).

|  | | 1983 | | | | | | |  |  | 2010 | | | | | | Differences between series 2010-1983  (pp) | |
| --- | --- | --- | --- | --- | --- | --- | --- | --- | --- | --- | --- | --- | --- | --- | --- | --- | --- | --- |
| IOTF | | | | CDC | | |  |  | IOTF | | | CDC | | |
| Thinness Grade3 | Thinness Grade 2 | Thinness Grade 1 | Thinness total | Thinness  < 3 percentile | Thinness <5 percentile | Thinness Total |  | Thinness Grade3 | Thinness Grade 2 | Thinness Grade 1 | Thinness total | Thinness  < 3 percentile | Thinness  <5 percentile | Thinness Total | IOTF | CDC |
| Age  (years) | N | n  % | n  % | n  % | n  % | n  % | n  % | n  % | N | n  % | n  % | n  % | n  % | n  % | n  % | n  % |
| 3·5 | 65 | 2  3·1 | 0  0 | 2  3·1 | 4  6·2 | 2  3·1 | 0  0 | 2  3·1 | 67 | 2  3·0 | 2  3·0 | 3  4·5 | 7  10·5 | 4  6·0 | 0  0 | 4  6.0 | 4·3 | 2·9 |
| 4·5 | 133 | 2  1·5 | 2  1·5 | 4  3·0 | 8  6·0 | 5  3·8 | 1  0·8 | 6  4·5 | 120 | 3  2·2 | 0  0 | 8  6·7 | 11  9·2 | 5  4·7 | 1  0·8 | 6  5·0 | 3·2 | 0·5 |
| 5·5 | 148 | 0  0 | 1  0·7 | 5  3·4 | 6  4·1 | 2  1·4 | 0  0 | 2  1·4 | 130 | 2  1·5 | 3  2·3 | 7  5·4 | 12  9·2 | 5  3·9 | 2  1·5 | 7  5·4 | 5·2 | 4·0* |
| 6·5 | 209 | 5  2·4 | 2  1·0 | 11  5·3 | 18  8·6 | 9  4·3 | 1  0·5 | 10  4·8 | 146 | 1  0·7 | 0  0 | 9  6·2 | 10  6·9 | 1  0·7 | 1  0·7 | 2  1·4 | -1·8 | -3·4 |
| 7·5 | 204 | 2  1·0 | 2  1·0 | 13  6·4 | 17  8·3 | 5  2·5 | 4  2·0 | 9  4·4 | 204 | 1  0·5 | 5  2·5 | 22  10·8 | 28  13·7 | 7  3·4 | 7  3·4 | 14  6·9 | 5·4 | 2·5 |
| 8·5 | 203 | 1  0·5 | 10  4·9 | 16  7·9 | 27  13·3 | 15  7·4 | 6  3·0 | 21  10·3 | 221 | 0  0 | 2  0·9 | 14  6·3 | 16  7·2 | 4  1·8 | 1  0·5 | 5  2·3 | -6·1** | -7·6*** |
| 9·5 | 212 | 2  0·5 | 4  1·9 | 23  10·9 | 29  13·7 | 12  5·7 | 5  2·4 | 17  8·0 | 202 | 0  0 | 1  0·5 | 21  10·4 | 22  10·9 | 8  4·0 | 4  2·0 | 12  5·9 | -2·8 | -2·1 |
| 10·5 | 192 | 1  0·5 | 4  2·1 | 16  8·3 | 21  10·9 | 6  3·1 | 3  1·6 | 9  4·7 | 206 | 0  0 | 1  0·5 | 16  7·8 | 17  8·3 | 1  0·5 | 4  2·0 | 5  2·4 | -2·7 | -2·3 |
| 11·5 | 236 | 2  0·9 | 11  4·7 | 35  14·8 | 48  20·3 | 10  4·2 | 10  4·2 | 20  8·5 | 218 | 0  0 | 3  1·4 | 18  8·3 | 21  9·6 | 1  0·5 | 5  2·3 | 6  2·8 | -10·7** | -5·7** |
| 12·5 | 220 | 3  1·4 | 2  0·9 | 28  12·7 | 33  15·0 | 9  4·1 | 2  0·9 | 11  5·0 | 179 | 3  1·7 | 2  1·1 | 19  10·6 | 24  13·4 | 7  3·9 | 3  1·7 | 10  5·6 | -1·6 | 0·6 |
| 13·5 | 213 | 3  1·4 | 6  2·8 | 19  8·9 | 28  13·2 | 9  4·2 | 8  3·8 | 17  8·0 | 220 | 0  0 | 2  0·9 | 16  7·3 | 18  8·2 | 1  0·5 | 3  1·4 | 4  1·8 | -5·0 | -6·2** |
| 14·5 | 218 | 1  0·5 | 2  0·9 | 23  10·6 | 26  11·9 | 10  4·6 | 3  1·4 | 13  6·0 | 161 | 1  0·6 | 1  0·6 | 14  8·7 | 16  9·9 | 5  3·1 | 5  3·1 | 10  6·2 | -2·0 | 0·3 |
| 15·5 | 257 | 2  0·8 | 2  0·8 | 16  6·2 | 20  7·8 | 5  2·0 | 6  2·3 | 11  4·3 | 170 | 0  0 | 3  1·8 | 14  8·2 | 17  10·0 | 7  4·1 | 1  0·6 | 8  4·7 | 2·2 | 0·4 |
| 16·5 | 215 | 1  0·5 | 0  0 | 8  3·7 | 9  4·2 | 1  0·5 | 4  1·9 | 5  2·3 | 178 | 1  0·6 | 3  1·7 | 10  5·6 | 14  7·7 | 7  3·9 | 3  1·7 | 10  5·6 | 3·7 | 3·3 |
| 17·5 | 243 | 0  0 | 1  0·4 | 23  9·5 | 24  9·9 | 5  2·1 | 2  0·8 | 7  2·9 | 132 | 0  0 | 3  2·3 | 24  18·2 | 27  20·5 | 6  4·5 | 6  4·5 | 12  9·1 | 10·6** | 6·2** |
| 18·5 | 193 | 1  0·5 | 1  0·5 | 12  6·2 | 14  7·3 | 1  0·5 | 0  0 | 1  0·5 | 112 | 0  0 | 1  0·9 | 15  13·4 | 16  14·3 | 0  0 | 1  0·9 | 1  0·9 | 7·0* | 0·4 |
| Total | 3161 | 28  0·9 | 50  1·6 | 254  8·0 | 332  10·5 | 106  3·4 | 54  1·7 | 161  5·1 | 2666 | 14  0·5 | 32  1·2 | 230  8·6 | 276  10·4 | 69  2·6 | 47  1·8 | 116  4·4 | -0·2 | -0·7 |

*p<0,05; **p<0,01; ***p<0,001
